# Supplementary material
Source: HighWire-hosted journal article supplement (https://jnm.snmjournals.org/highwire/filestream/95327/field_highwire_adjunct_files/0/197186_Supplemental_Data.pdf)
Supplement: 197186_Supplemental_Data.pdf [file 197186_Supplemental_Data.pdf]

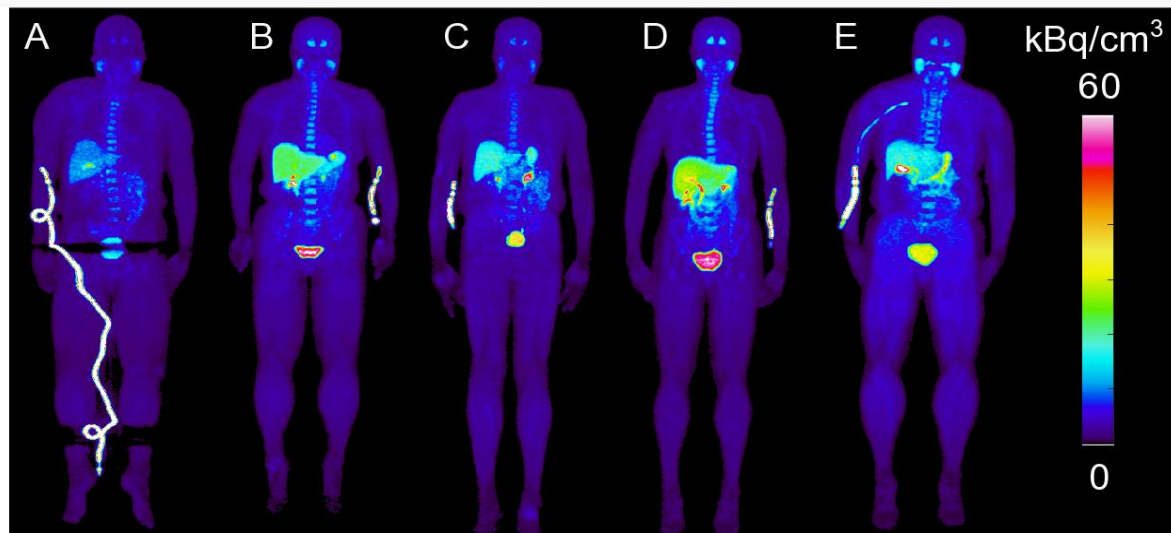

**SUPPLEMENTAL FIGURE 1.** Maximum Intensity Projection images of the five participants scanned at 40 min p.i. <sup>18</sup>F-FE-PE2I is a lipophilic substance which sticks to the wall of the plastic injection tube. As can be seen in figure A, a long injection tube was used for participant 1. Because of high activity in the injection tube, artefacts occurred (black lines in the figure A) due to saturation of the detectors in the PET-camera. Shorter injection tubes were used for the other participants, in order to minimize this effect.
